# Supplementary material for: Low Expression of DDX60 Gene Might Associate with the Radiosensitivity for Patients with Breast Cancer
Source: J Oncol. 2020 Jul 20;2020:8309492. doi: 10.1155/2020/8309492 (PMC7387961; doi:10.1155/2020/8309492)
Supplement: Supplementary Materials — Table S1: comparisons of radiation dose, type, and site in patients under radiotherapy. Figure S1: survival curves under different expression levels of DDX60 for all patients. The total samples were stratified by age (≥60 and <60). The logrank test was employed to estimate p values. The number before and after the slash referred to the number of deaths and sample size in subgroups, respectively. Figure S2: survival curves under different expression levels of DDX60 for all patients. The total samples were stratified by T stage (T1/T2 and T3/T4). The logrank test was employed to estimate p values. The number before and after the slash referred to the number of deaths and sample size in subgroups, respectively. Figure S3: survival curves under different expression levels of DDX60 for all patients. The total samples were stratified by N stage (N0/N1 and N2/N3). The logrank test was employed to estimate p values. The number before and after the slash referred to the number of deaths and sample size in subgroups, respectively. Figure S4: survival curves under different expression levels of DDX60 for all patients. The total samples were stratified by M stage (M0 and M1). The logrank test was employed to estimate p values. The number before and after the slash referred to the number of deaths and sample size in subgroups, respectively. Figure S5: survival curves under different expression levels of DDX60 for all patients. The total samples were stratified by chemotherapy (yes and no). The logrank test was employed to estimate p values. The number before and after the slash referred to the number of deaths and sample size in subgroups, respectively. Figure S6: the HR values of radiotherapy along with different cutoffs. [file 8309492.f1.pdf]

**Table S1:** Comparisons of radiation dose, type and site in patients under radiotherapy.

|           | Low Expression Group |            |              | High Expression Group |            |              | Wilcoxon or Fisher exact test P value |
|-----------|----------------------|------------|--------------|-----------------------|------------|--------------|---------------------------------------|
|           | N                    | Mean(sd)   | Median (IQR) | N                     | Mean(sd)   | Median (IQR) |                                       |
| Dose (Gy) | 154                  | 13.0(19.1) | 6.0(1.4)     | 172                   | 10.5(14.7) | 6.0(1.3)     | 0.198                                 |
| Type      |                      |            |              |                       |            |              | 1.000                                 |
| External  | 152                  | -          | -            | 169                   | -          | -            |                                       |
| Other     | 2                    | -          | -            | 3                     | -          | -            |                                       |
| Site      |                      |            |              |                       |            |              | 1.000                                 |
| Distant   | 2                    | -          | -            | 2                     | -          | -            |                                       |
| Primary   | 125                  | -          | -            | 139                   | -          | -            |                                       |
| Regional  | 27                   | -          | -            | 31                    | -          | -            |                                       |

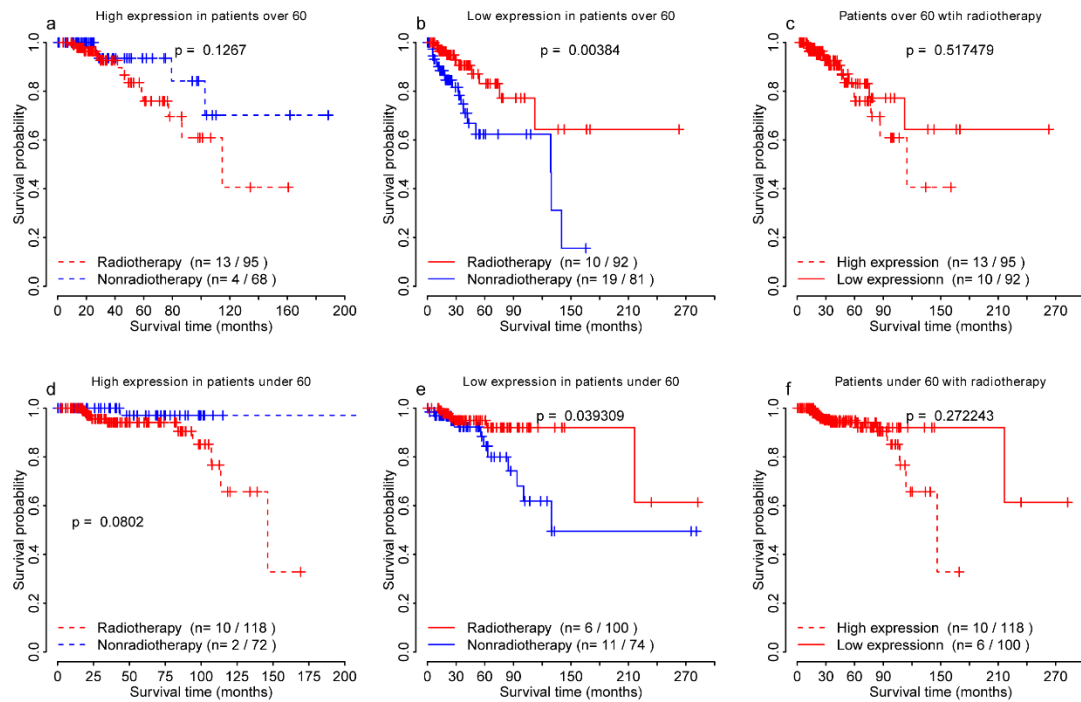

Figure S1: Survival curves under different expression levels of DDX60 for all patients. The total samples were stratified by Age ( $\geq 60$  and  $< 60$ ). Log-rank test was employed to estimate p values. The number before and after the slash referred to the number of deaths and sample size in subgroups, respectively.

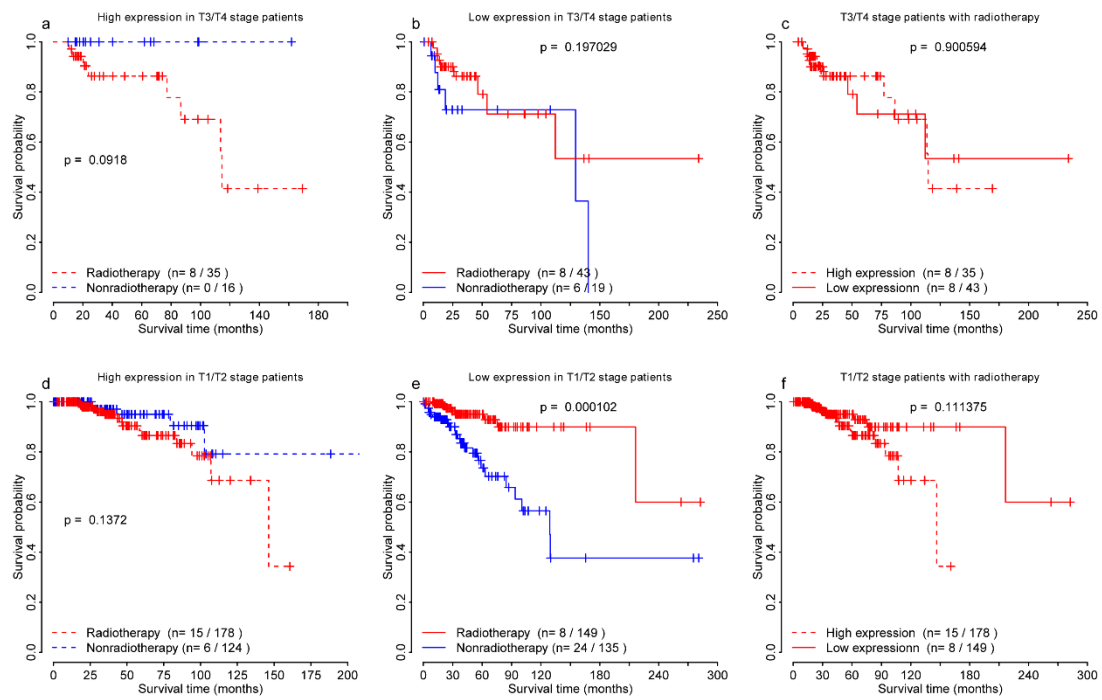

Figure S2: Survival curves under different expression levels of DDX60 for all patients. The total samples were stratified by T stage (T1/T2 and T3/T4). Log-rank test was employed to estimate p values. The number before and after the slash referred to the number of deaths and sample size in subgroups, respectively.

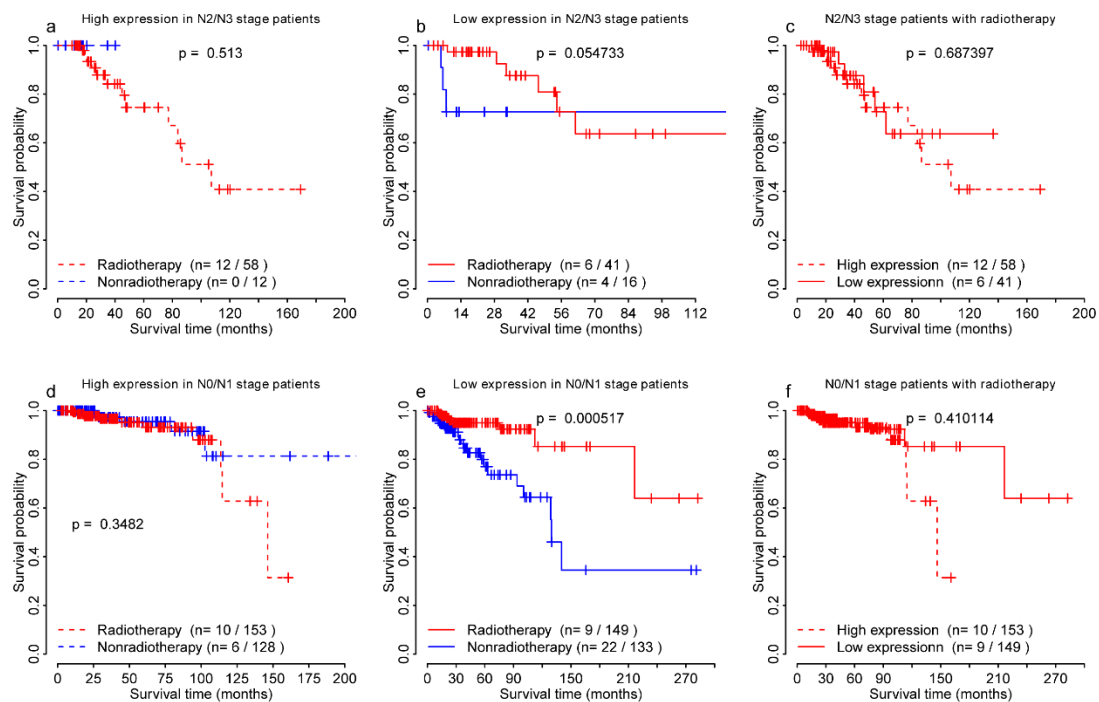

Figure S3: Survival curves under different expression levels of DDX60 for all patients. The total samples were stratified by N stage (N0/N1 and N2/N3). Log-rank test was employed to estimate p values. The number before and after the slash referred to the number of deaths and sample size in subgroups, respectively.

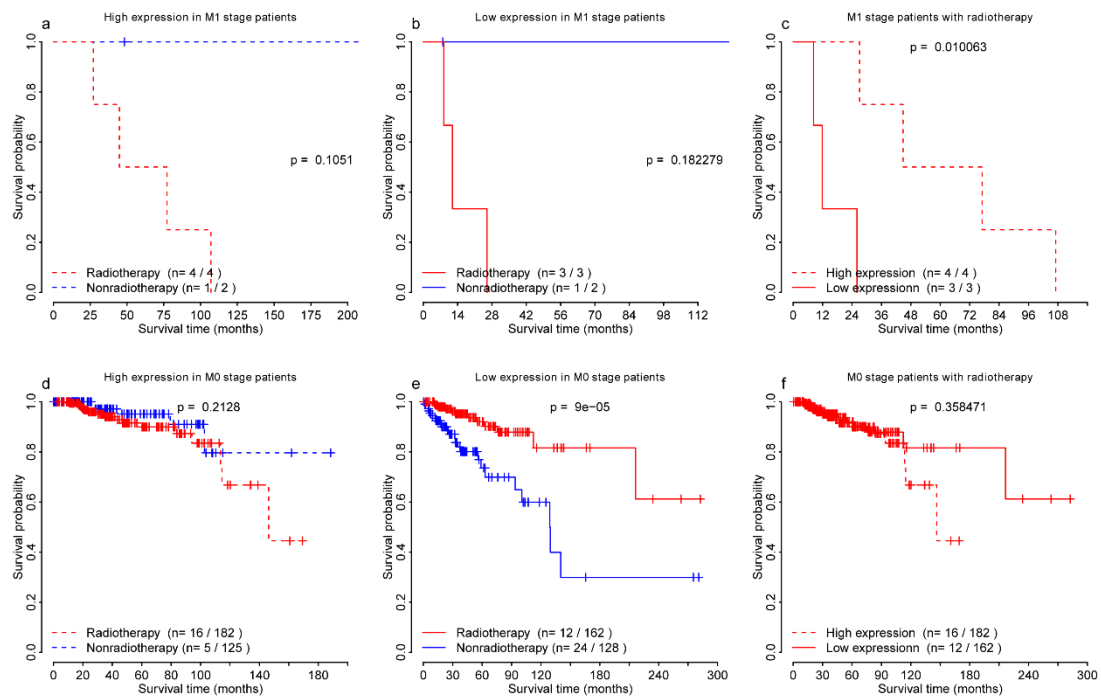

Figure S4: Survival curves under different expression levels of DDX60 for all patients. The total samples were stratified by M stage (M0 and M1). Log-rank test was employed to estimate p values. The number before and after the slash referred to the number of deaths and sample size in subgroups, respectively.

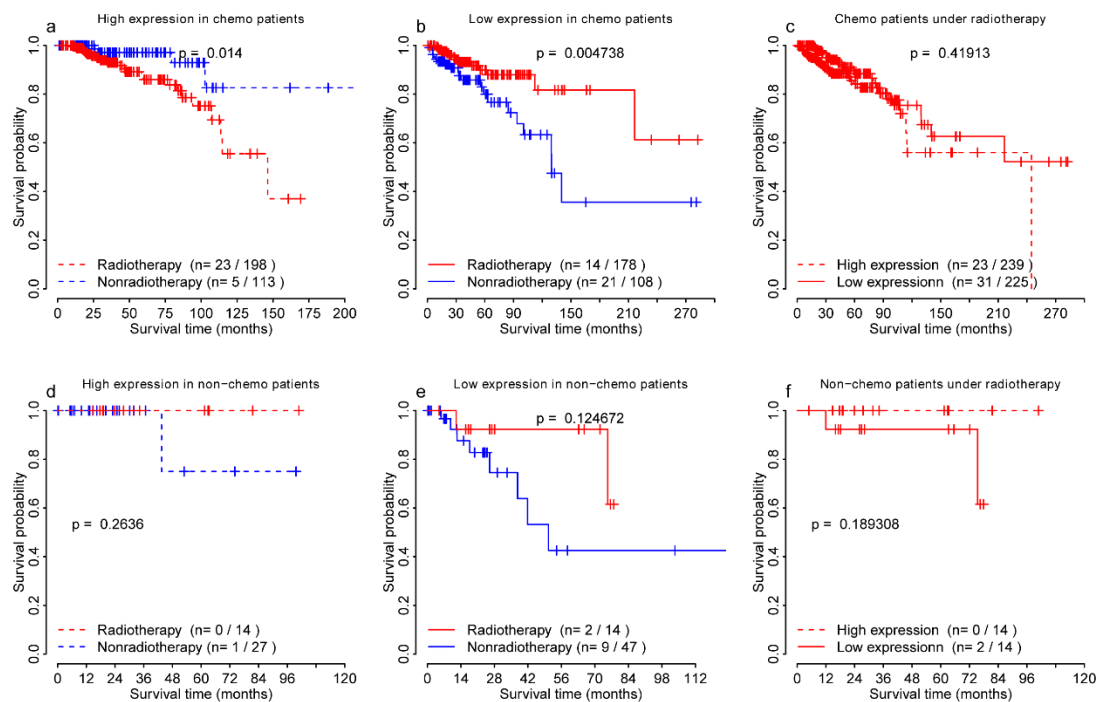

Figure S5: Survival curves under different expression levels of DDX60 for all patients. The total samples were stratified by Chemotherapy (yes and no). Log-rank test was employed to estimate p values. The number before and after the slash referred to the number of deaths and sample size in subgroups, respectively.

the HR values of radiotherapy along with different cutoffs

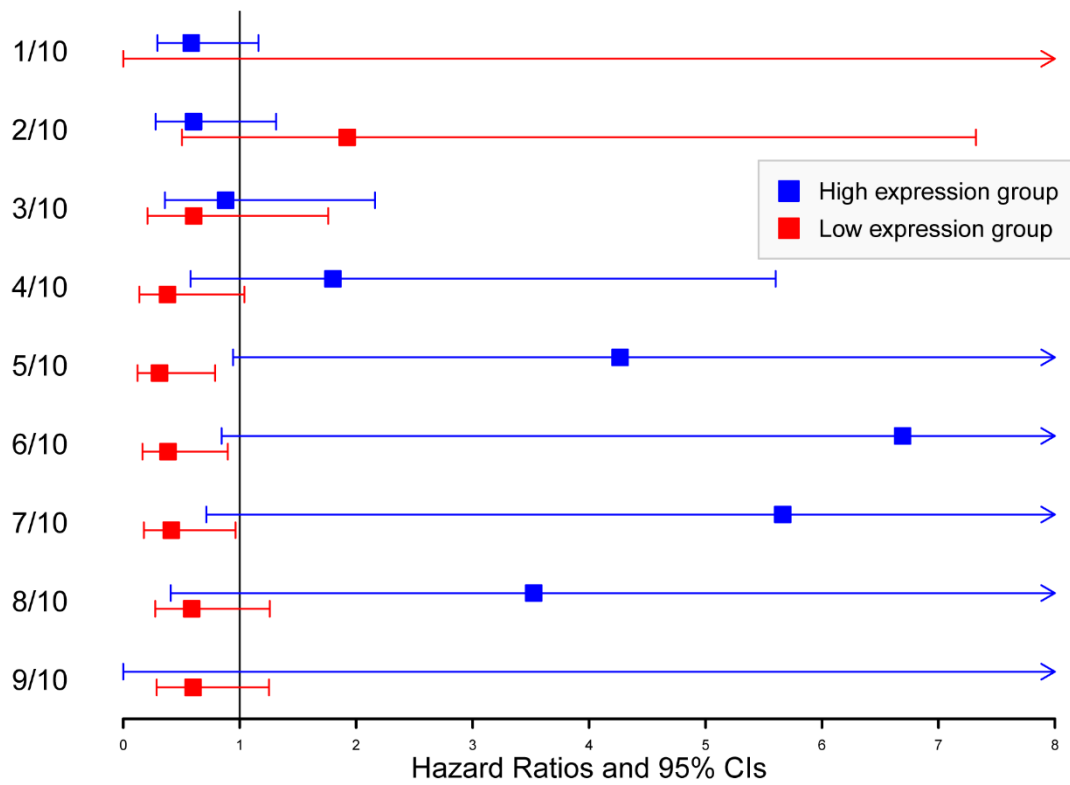

Figure S6: the HR values of radiotherapy along with different cutoffs.
